# Supplementary material
Source: Royal Society of Chemistry journal article supplement (doi:10.1039/d6ma00373g)
Supplement: d6ma00373g1.pdf [file d6ma00373g1.pdf]

Supplementary Information

**Double-Network PEDOT:PSS Xerogel Fibers with High Stretchability and Electrical Stability for Wearable Strain Sensing**

Gayaneh Petrossian,<sup>a</sup> Sara Ebrahimi,<sup>a</sup> Floriane Miquet-Westphal,<sup>a</sup> Hang Xu,<sup>b</sup> and Fabio Cicoira <sup>\*a</sup>

a. Department of Chemical Engineering, Polytechnique Montréal, Montréal, Québec H3C 3A7, Canada

b. Department of Mechanical, Industrial and Aerospace Engineering, Concordia University, Montréal, Québec H3A 0C3, Canada

\*Corresponding author: [fabio.cicoira@polymtl.ca](mailto:fabio.cicoira@polymtl.ca)

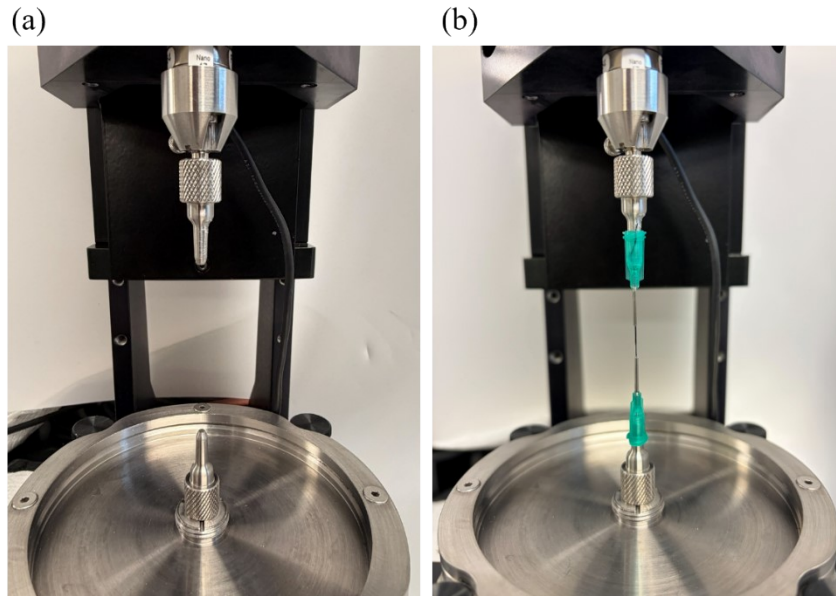

**Fig. S1** Tensile testing setup for xerogel fibers using a custom double-needle holder assembly on the Mach-1 mechanical tester. (a) Empty opposing tips, and (b) xerogel fiber secured between the needles using cyanoacrylate adhesive prior to tensile loading.

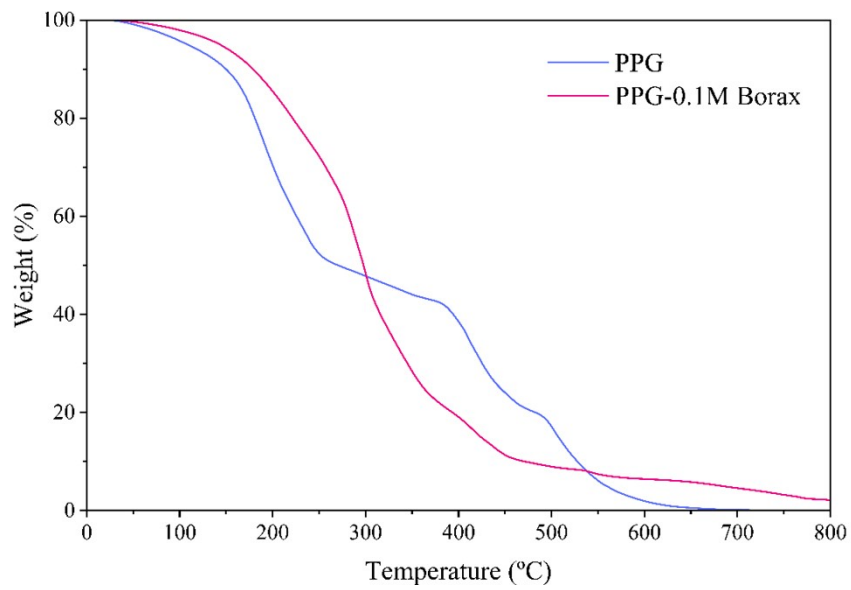

**Fig. S2** TGA thermograms of PPG and PPG-0.1M borax xerogels.

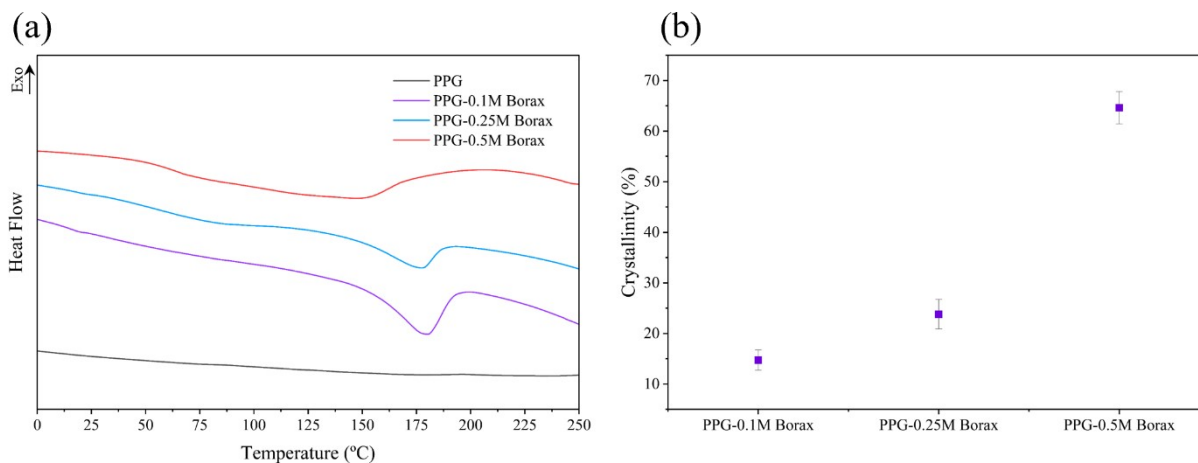

**Fig. S3** (a) DSC thermograms (second heating) of PPG and borax-treated xerogels. (b) Corresponding crystallinity of the xerogels calculated from the melting enthalpy. Error bars represent standard deviation ( $n = 3$ ).

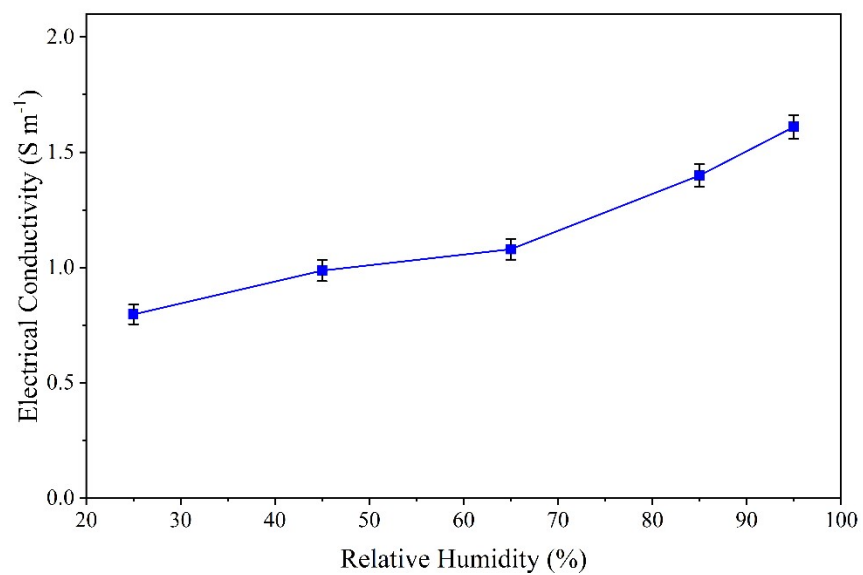

**Fig. S4** Electrical conductivity of the PPG-0.1 M borax xerogel fiber as a function of relative humidity. Error bars represent the standard deviation of three measurements.

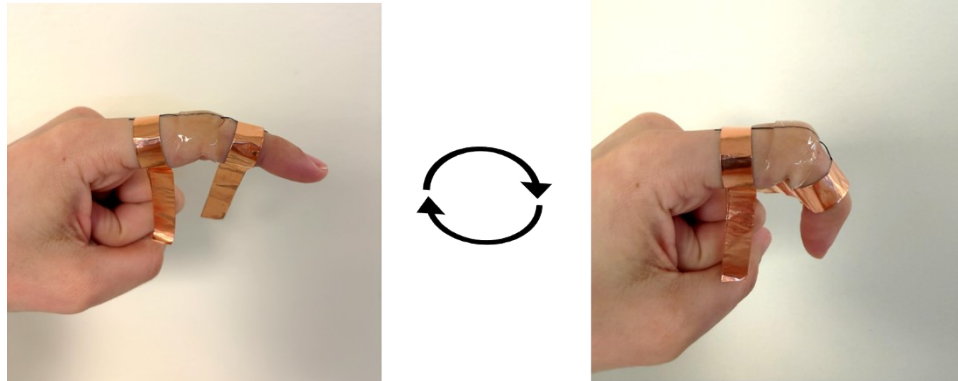

**Fig. S5** Photographs of the PPG-0.1 M borax xerogel fiber integrated as a wearable strain sensor on a finger in the relaxed (left) and bent (right) states. The resistance of the fiber changes with finger bending, enabling detection of human motion.
